# Supplementary material
Source: PubMed Central journal article supplement (PMC3697254)
Supplement: JB.01122-12_zjb999092633so1.pdf [file JB.01122-12_zjb999092633so1.pdf]

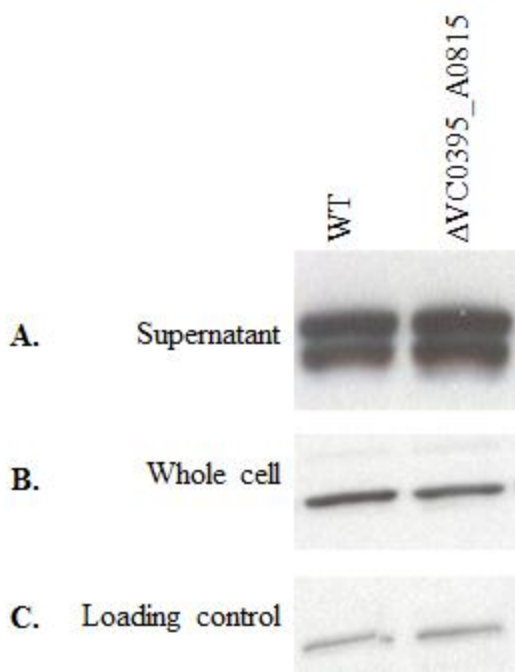

**Supplemental Fig. 1.** Deletion of VCO395\_A0815 has no effect on TcpF secretion. Wild-type or mutant strains were grown under *tcp* inducing conditions overnight. After centrifugation 20 $\mu$ L culture supernatants (A) or 16 $\mu$ g whole cell lysate (B) were loaded onto a polyacrylamide gel. After protein electrophoresis and transfer to a nitrocellulose membrane, immunoblotting was performed with TcpF antisera. Anti-GbpA of culture supernatants was used as a loading control (C).

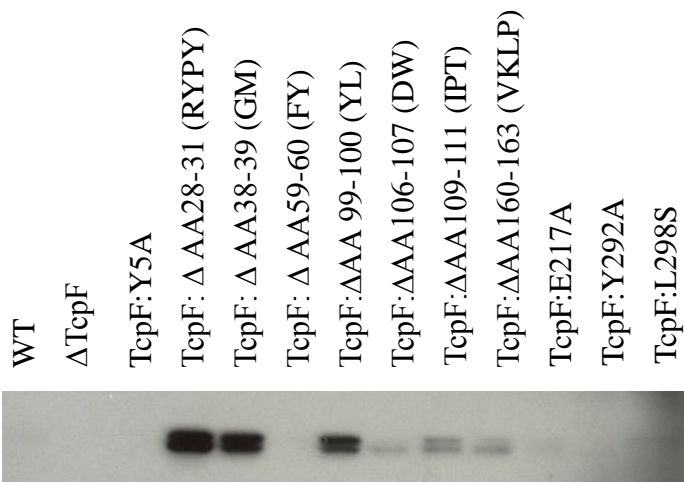

**Supplemental Fig. 2.** 5x longer exposure of NFL (non-full length) TcpF derivatives in supernatants from strains with mutations in regions of *tcpF* predicted to encode secretion determinants by linker scanning mutagenesis and alignment with environmental homologues presented in Figure 3. The exposure time for the film is 5 min in comparison to 1 min of NFL in Figure 3.
